# Supplementary material for: Coronavirus-Specific Antibody and T Cell Responses Developed after Sputnik V Vaccination in Patients with Chronic Lymphocytic Leukemia
Source: Int J Mol Sci. 2022 Dec 27;24(1):416. doi: 10.3390/ijms24010416 (PMC9820366; doi:10.3390/ijms24010416)
Supplement: Supplementary file 1 [file ijms-24-00416-s001.zip › Supplementary Tables.pdf]

**Supplementary Table S1.** Dynamics of the antibody response estimated among CLL patients.

| Grouping parameter                   |     | Day 1 |                 |             |      | Day 21 |                  |              |      | Day 49 |                   |              |      |
|--------------------------------------|-----|-------|-----------------|-------------|------|--------|------------------|--------------|------|--------|-------------------|--------------|------|
|                                      |     | N     | median [IQR]    | pval        | qval | N      | median [IQR]     | pval         | qval | N      | median [IQR]      | pval         | qval |
| iBTK-containing treatment            | YES | 47    | 0.7 [0.2-12.9]  | 0.19        | 0.32 | 47     | 2.9 [0.2-119.7]  | 0.46         | 0.48 | 36     | 5.7 [1.0-495.6]   | 0.46         | 0.4  |
|                                      | NO  | 24    | 0.6 [0.1-20.5]  |             |      | 24     | 2.8 [0.3-152.0]  |              |      | 16     | 10.8 [0.8-429.7]  |              |      |
| Combination therapy with anti-CD20   | YES | 14    | 0.4 [0.2-2.7]   | 0.22        | 0.33 | 14     | 0.4 [0.2-2.5]    | <b>0.03</b>  | 0.17 | 9      | 1.0 [0.6-2.6]     | <b>0.034</b> | 0.23 |
|                                      | NO  | 57    | 1.0 [0.2-18.1]  |             |      | 57     | 6.7 [0.3-240.8]  |              |      | 43     | 12.1 [1.1-1155.0] |              |      |
| Venetoclax-containing treatment      | YES | 23    | 0.7 [0.2-10.8]  | 0.46        | 0.48 | 23     | 0.5 [0.2-187.8]  | 0.22         | 0.26 | 15     | 2.5 [0.7-11.5]    | 0.11         | 0.4  |
|                                      | NO  | 48    | 1.0 [0.1-22.7]  |             |      | 48     | 4.4 [0.4-119.4]  |              |      | 37     | 16.3 [1.0-1494.2] |              |      |
| Total IgG > 5 g/L                    | YES | 49    | 1.0 [0.2-21.6]  | 0.15        | 0.3  | 49     | 7.2 [0.4-240.8]  | <b>0.019</b> | 0.17 | 37     | 16.4 [1.2-1494.2] | <b>0.023</b> | 0.18 |
|                                      | NO  | 20    | 0.3 [0.2-2.6]   |             |      | 20     | 0.5 [0.2-10.8]   |              |      | 15     | 1.6 [0.4-11.0]    |              |      |
| Total IgM > 0.41 g/L                 | YES | 29    | 0.4 [0.1-32.6]  | 0.12        | 0.26 | 29     | 6.7 [0.4-137.8]  | 0.24         | 0.17 | 21     | 44.7 [2.5-388.9]  | <b>0.038</b> | 0.26 |
|                                      | NO  | 40    | 1.1 [0.2-10.4]  |             |      | 40     | 1.5 [0.2-120.7]  |              |      | 31     | 2.6 [0.4-1094.3]  |              |      |
| Total IgA > 0.8 g/L                  | YES | 34    | 1.4 [0.2-29.9]  | 0.11        | 0.26 | 34     | 37.2 [0.5-833.2] | <b>0.012</b> | 0.17 | 25     | 61.2 [1.2-3592.9] | <b>0.028</b> | 0.17 |
|                                      | NO  | 35    | 0.4 [0.2-2.8]   |             |      | 35     | 1.0 [0.2-15.8]   |              |      | 27     | 2.6 [0.6-22.3]    |              |      |
| Age > 70 years                       | YES | 19    | 1.2 [0.2-21.0]  | 0.4         | 0.46 | 19     | 1.8 [0.3-222.6]  | 0.45         | 0.17 | 16     | 1.0 [0.5-20.3]    | <b>0.025</b> | 0.26 |
|                                      | NO  | 52    | 0.7 [0.2-14.9]  |             |      | 52     | 3.3 [0.2-119.4]  |              |      | 36     | 16.3 [1.6-1510.1] |              |      |
| Unmutated IGHV genes                 | YES | 53    | 0.4 [0.1-3.3]   | <b>0.03</b> | 0.17 | 53     | 1.0 [0.2-38.4]   | 0.19         | 0.49 | 39     | 3.6 [0.8-68.0]    | 0.48         | 0.49 |
|                                      | NO  | 10    | 2.1 [0.6-100.5] |             |      | 10     | 15.0 [0.7-263.0] |              |      | 7      | 6.6 [0.6-1087.2]  |              |      |
| 17p deletion                         | YES | 23    | 0.7 [0.2-12.9]  | 0.3         | 0.4  | 23     | 8.4 [0.3-239.3]  | 0.14         | 0.33 | 18     | 5.7 [1.3-2898.6]  | 0.22         | 0.21 |
|                                      | NO  | 45    | 0.7 [0.2-13.8]  |             |      | 45     | 1.2 [0.2-38.4]   |              |      | 31     | 3.6 [0.8-42.6]    |              |      |
| Male sex                             | YES | 40    | 0.8 [0.2-4.7]   | 0.37        | 0.45 | 40     | 1.1 [0.3-92.5]   | 0.33         | 0.4  | 24     | 5.3 [0.6-183.8]   | 0.28         | 0.25 |
|                                      | NO  | 31    | 0.7 [0.1-23.9]  |             |      | 31     | 3.7 [0.2-130.1]  |              |      | 28     | 9.7 [1.1-985.4]   |              |      |
| Number of previous therapy lines > 2 | YES | 17    | 0.4 [0.1-2.0]   | 0.11        | 0.26 | 17     | 0.9 [0.2-7.2]    | 0.17         | 0.32 | 14     | 2.3 [0.9-20.5]    | 0.18         | 0.46 |
|                                      | NO  | 54    | 1.0 [0.2-31.0]  |             |      | 54     | 4.4 [0.3-212.8]  |              |      | 38     | 14.2 [1.0-1324.6] |              |      |

S-protein specific IgG titers were evaluated using the automated ARCHITECT i1000SR analyzer with compatible reagent kit (Abbott, USA) and presented as BAU/mL. N, number of patients per group; IQR, interquartile range; pval – p-level estimated using two-sided Mann–Whitney U test; qval – false discovery rate q-values estimated using the Benjamin–Hochberg (BH) procedure. Values below a threshold of 0.05 are marked in bold.

**Supplementary Table S2.** Dynamics of the T cell response among CLL patients estimated using ELISpot.

| Grouping parameter                   |     | Day 1 |                     |                |               | Day 21 |                      |               |              | Day 49 |                       |                |              |
|--------------------------------------|-----|-------|---------------------|----------------|---------------|--------|----------------------|---------------|--------------|--------|-----------------------|----------------|--------------|
|                                      |     | N     | median [IQR]        | pval           | qval          | N      | median [IQR]         | pval          | qval         | N      | median [IQR]          | pval           | qval         |
| iBTK-containing treatment            | YES | 47    | 286.7 [18.3-976.7]  | <b>0.00019</b> | <b>0.0084</b> | 47     | 910.0 [303.3-1348.3] | <b>0.0011</b> | <b>0.017</b> | 34     | 930.0 [462.5-1443.3]  | <b>0.002</b>   | 0.1          |
|                                      | NO  | 24    | 16.7 [3.3-88.3]     |                |               | 24     | 80.0 [17.5-595.8]    |               |              | 16     | 96.7 [42.5-194.2]     |                |              |
| Combination therapy with anti-CD20   | YES | 14    | 45.0 [0.8-150.8]    | <b>0.032</b>   | 0.12          | 14     | 260.0 [31.7-722.5]   | <b>0.033</b>  | 0.42         | 8      | 251.7 [66.7-1452.5]   | 0.26           | 0.44         |
|                                      | NO  | 57    | 170.0 [13.3-823.3]  |                |               | 57     | 643.3 [110.0-1420.0] |               |              | 42     | 658.3 [115.8-1377.5]  |                |              |
| Venetoclax-containing treatment      | YES | 23    | 170.0 [15.0-1273.3] | 0.12           | 0.31          | 23     | 690.0 [218.3-1153.3] | 0.49          | 0.44         | 15     | 596.7 [205.0-1443.3]  | 0.33           | 0.44         |
|                                      | NO  | 48    | 95.0 [10.0-463.3]   |                |               | 48     | 403.3 [80.0-1329.2]  |               |              | 35     | 633.3 [90.0-1361.7]   |                |              |
| Total IgG > 5 g/L                    | YES | 49    | 143.3 [10.0-860.0]  | 0.41           | 0.46          | 49     | 620.0 [76.7-1230.0]  | 0.5           | 0.37         | 36     | 683.3 [105.8-1450.0]  | 0.18           | 0.21         |
|                                      | NO  | 20    | 105.0 [15.8-423.3]  |                |               | 20     | 520.0 [142.5-1395.0] |               |              | 14     | 498.3 [65.8-1110.0]   |                |              |
| Total IgM > 0.41 g/L                 | YES | 29    | 96.7 [10.0-846.7]   | 0.34           | 0.44          | 29     | 550.0 [80.0-1213.3]  | 0.22          | 0.5          | 22     | 658.3 [108.3-1325.8]  | 0.49           | 0.37         |
|                                      | NO  | 40    | 153.3 [15.8-740.0]  |                |               | 40     | 713.3 [106.7-1396.7] |               |              | 28     | 596.7 [86.7-1443.3]   |                |              |
| Total IgA > 0.8 g/L                  | YES | 34    | 110.0 [4.2-810.8]   | 0.21           | 0.37          | 34     | 608.3 [80.0-1193.3]  | 0.21          | 0.46         | 25     | 683.3 [103.3-1313.3]  | 0.4            | 0.44         |
|                                      | NO  | 35    | 170.0 [16.7-746.7]  |                |               | 35     | 550.0 [131.7-1480.0] |               |              | 25     | 596.7 [106.7-1470.0]  |                |              |
| Age > 70 years                       | YES | 19    | 13.3 [5.0-105.0]    | <b>0.0023</b>  | <b>0.017</b>  | 19     | 80.0 [45.0-670.0]    | <b>0.0041</b> | <b>0.011</b> | 15     | 90.0 [38.3-596.7]     | <b>0.00069</b> | <b>0.011</b> |
|                                      | NO  | 52    | 203.3 [16.7-955.0]  |                |               | 52     | 781.7 [179.2-1431.7] |               |              | 35     | 1020.0 [223.3-1481.7] |                |              |
| Unmutated IGHV genes                 | YES | 53    | 136.7 [10.0-823.3]  | 0.21           | 0.37          | 53     | 620.0 [96.7-1230.0]  | 0.45          | 0.3          | 38     | 708.3 [185.0-1443.3]  | 0.11           | 0.44         |
|                                      | NO  | 10    | 55.0 [7.5-181.7]    |                |               | 10     | 306.7 [153.3-1171.7] |               |              | 7      | 90.0 [68.3-676.7]     |                |              |
| 17p deletion                         | YES | 23    | 170.0 [73.3-940.0]  | <b>0.029</b>   | 0.12          | 23     | 946.7 [303.3-1368.3] | 0.068         | 0.1          | 16     | 1196.7 [212.5-1572.5] | <b>0.021</b>   | 0.3          |
|                                      | NO  | 45    | 20.0 [10.0-406.7]   |                |               | 45     | 326.7 [76.7-1213.3]  |               |              | 31     | 400.0 [81.7-981.7]    |                |              |
| Male sex                             | YES | 40    | 108.3 [10.0-485.8]  | 0.27           | 0.42          | 40     | 543.3 [102.5-1195.0] | 0.38          | 0.49         | 24     | 615.0 [105.8-1433.3]  | 0.46           | 0.45         |
|                                      | NO  | 31    | 136.7 [10.0-1005.0] |                |               | 31     | 620.0 [88.3-1368.3]  |               |              | 26     | 673.3 [95.8-1377.5]   |                |              |
| Number of previous therapy lines > 2 | YES | 17    | 170.0 [16.7-523.3]  | 0.35           | 0.44          | 17     | 430.0 [70.0-1153.3]  | 0.21          | 0.32         | 13     | 226.7 [30.0-1123.3]   | 0.13           | 0.32         |
|                                      | NO  | 54    | 95.0 [10.0-753.3]   |                |               | 54     | 666.7 [110.0-1367.5] |               |              | 37     | 733.3 [106.7-1430.0]  |                |              |

IFN $\gamma$ -expressing T cells were evaluated using the ELISpot assay (see Materials and Methods section in main text) and presented as standard spot forming units (SFU) per 10<sup>6</sup> PBMC. N, number of patients per group; IQR, interquartile range; pval – p-level estimated using two-sided Mann–Whitney U test; qval – false discovery rate q-values estimated using the Benjamin–Hochberg (BH) procedure. Values below a threshold of 0.05 are marked in bold.

**Supplementary Table S3.** Dynamics of the T cell response among CLL patients estimated using flow cytometry.

| Grouping parameter                   |     | Day 1 |              |               |      | Day 21 |              |              |      | Day 49 |              |              |      |
|--------------------------------------|-----|-------|--------------|---------------|------|--------|--------------|--------------|------|--------|--------------|--------------|------|
|                                      |     | N     | median [IQR] | pval          | qval | N      | median [IQR] | pval         | qval | N      | median [IQR] | pval         | qval |
| iBTK-containing treatment            | YES | 48    | 30 [8-69]    | <b>0.0048</b> | 0.21 | 46     | 48 [26-91]   | <b>0.017</b> | 0.32 | 32     | 41 [14-71]   | <b>0.066</b> | 0.45 |
|                                      | NO  | 25    | 11 [3-23]    |               |      | 24     | 17 [9-48]    |              |      | 15     | 18 [12-34]   |              |      |
| Combination therapy with anti-CD20   | YES | 15    | 20 [5-27]    | 0.12          | 0.32 | 14     | 30 [13-48]   | 0.13         | 0.32 | 7      | 16 [12-33]   | 0.1          | 0.45 |
|                                      | NO  | 58    | 19 [7-67]    |               |      | 56     | 39 [17-91]   |              |      | 40     | 28 [14-70]   |              |      |
| Venetoclax-containing treatment      | YES | 23    | 20 [5-81]    | 0.37          | 0.45 | 23     | 39 [16-76]   | 0.46         | 0.45 | 15     | 33 [15-73]   | 0.34         | 0.29 |
|                                      | NO  | 50    | 19 [7-62]    |               |      | 47     | 35 [16-84]   |              |      | 32     | 20 [12-65]   |              |      |
| Total IgG > 5 g/L                    | YES | 50    | 20 [7-67]    | 0.13          | 0.32 | 47     | 48 [17-98]   | <b>0.045</b> | 0.35 | 32     | 32 [13-74]   | 0.16         | 0.45 |
|                                      | NO  | 20    | 14 [6-39]    |               |      | 20     | 25 [14-42]   |              |      | 15     | 18 [13-47]   |              |      |
| Total IgM > 0.41 g/L                 | YES | 30    | 20 [6-59]    | 0.41          | 0.45 | 28     | 29 [13-67]   | 0.14         | 0.45 | 21     | 22 [14-66]   | 0.37         | 0.32 |
|                                      | NO  | 40    | 19 [7-67]    |               |      | 39     | 39 [19-108]  |              |      | 26     | 22 [13-62]   |              |      |
| Total IgA > 0.8 g/L                  | YES | 34    | 20 [6-66]    | 0.34          | 0.45 | 32     | 52 [14-94]   | 0.28         | 0.45 | 23     | 21 [12-61]   | 0.24         | 0.29 |
|                                      | NO  | 36    | 17 [7-53]    |               |      | 35     | 33 [16-59]   |              |      | 24     | 28 [16-66]   |              |      |
| Age > 70 years                       | YES | 21    | 15 [6-34]    | 0.1           | 0.32 | 21     | 28 [14-51]   | 0.074        | 0.3  | 15     | 19 [9-44]    | <b>0.047</b> | 0.3  |
|                                      | NO  | 52    | 20 [7-66]    |               |      | 49     | 42 [16-104]  |              |      | 32     | 37 [15-70]   |              |      |
| Unmutated IGHV genes                 | YES | 55    | 15 [5-64]    | 0.3           | 0.45 | 52     | 32 [14-68]   | 0.1          | 0.49 | 35     | 22 [12-70]   | 0.49         | 0.45 |
|                                      | NO  | 10    | 21 [8-54]    |               |      | 10     | 113 [18-123] |              |      | 7      | 16 [15-48]   |              |      |
| 17p deletion                         | YES | 23    | 15 [7-74]    | 0.4           | 0.45 | 22     | 40 [23-59]   | 0.48         | 0.32 | 15     | 19 [12-37]   | 0.14         | 0.45 |
|                                      | NO  | 47    | 19 [6-62]    |               |      | 46     | 32 [15-91]   |              |      | 29     | 41 [13-73]   |              |      |
| Male sex                             | YES | 42    | 19 [7-60]    | 0.38          | 0.45 | 42     | 38 [16-88]   | 0.4          | 0.45 | 22     | 40 [13-65]   | 0.27         | 0.4  |
|                                      | NO  | 31    | 20 [6-63]    |               |      | 28     | 32 [16-74]   |              |      | 25     | 19 [14-64]   |              |      |
| Number of previous therapy lines > 2 | YES | 17    | 19 [5-35]    | 0.13          | 0.32 | 16     | 36 [26-56]   | 0.41         | 0.44 | 12     | 18 [15-48]   | 0.22         | 0.49 |
|                                      | NO  | 56    | 20 [7-67]    |               |      | 54     | 34 [15-101]  |              |      | 35     | 24 [13-71]   |              |      |

CD4+ T cells were evaluated using the flow cytometry assay (see Materials and Methods section in main text) and presented as coronavirus-specific cells per 104 total CD4+ T cells. N, number of patients per group; IQR, interquartile range; pval – p-level estimated using two-sided Mann–Whitney U test; qval – false discovery rate q-values estimated using the Benjamin–Hochberg (BH) procedure. Values below a threshold of 0.05 are marked in bold.
